# Supplementary material for: Physical and Thermal Characterizations of Newly Synthesized Liquid Crystals Based on Benzotrifluoride Moiety
Source: MDPI journal article supplement (doi:10.3390/ma16124304), 2023-06-10
Supplement: s1 [file s1]

## Supplementary data

**Table S1.** Mesomorphic transition results for **In**.

| <b>Comp.</b> | transition temperature, °C and (enthalpy of transitions in kJ/mol) | <b>Comp.</b> | transition temperature, °C and (enthalpy of transitions in kJ/mol) |
|--------------|--------------------------------------------------------------------|--------------|--------------------------------------------------------------------|
| <b>16</b>    | Cr 140.1 (41.7) SmA 147.8 (2.6) N 234.0 (1.4)                      | <b>II6</b>   | Cr 103.2 (42.40) I                                                 |
| <b>18</b>    | Cr 127.4 (46.6) SmA 149.4 (4.4) N 222.1 (2.0)                      | <b>II8</b>   | Cr 97.6 (50.71) N 100.2 (2.37) I                                   |
| <b>110</b>   | Cr 96.1 (49.2) SmA 151.5 (2.2) N 195.4 (1.5)                       | <b>II16</b>  | Cr 98.9 (53.20) I                                                  |
| <b>112</b>   | Cr 137.5 (51.9) SmA 181.2 (1.9) N 186.5 (1.2)                      |              |                                                                    |

**Table S2.** Different quantum chemical parameters for the optimized structures of the molecules for series **In** and **II**n.

| <b>Parameter</b>             | <b>I6</b> | <b>I8</b> | <b>I10</b> | <b>I12</b> | <b>II6</b> | <b>II8</b> | <b>II16</b> |
|------------------------------|-----------|-----------|------------|------------|------------|------------|-------------|
| <b>E<sub>HOMO</sub> (eV)</b> | -6.528    | -6.527    | -6.527     | -6.528     | -0.21572   | -0.21566   | -0.21571    |
| <b>E<sub>LUMO</sub> (eV)</b> | -2.348    | -2.348    | -2.347     | -2.348     | -0.07816   | -0.07812   | -0.07815    |
| <b>ΔE (eV)</b>               | 4.180     | 4.180     | 4.180      | 4.180      | 0.13756    | 0.13754    | 0.13756     |
| <b>χ (eV)</b>                | 0.478     | 0.478     | 0.478      | 0.478      | 0.14694    | 0.14689    | 0.14693     |
| <b>μ (eV)</b>                | -4.438    | -4.437    | -4.437     | -4.438     | -0.14694   | -0.14689   | -0.14693    |
| <b>η (eV)</b>                | 0.239     | 0.239     | 0.239      | 0.239      | 0.06878    | 0.06877    | 0.06878     |
| <b>σ (eV<sup>-1</sup>)</b>   | 4.713     | 4.711     | 4.710      | 4.713      | 14.53911   | 14.54122   | 14.53911    |
| <b>ω (eV)</b>                | -6.528    | -6.527    | -6.527     | -6.528     | 0.15696    | 0.15688    | 0.15694     |

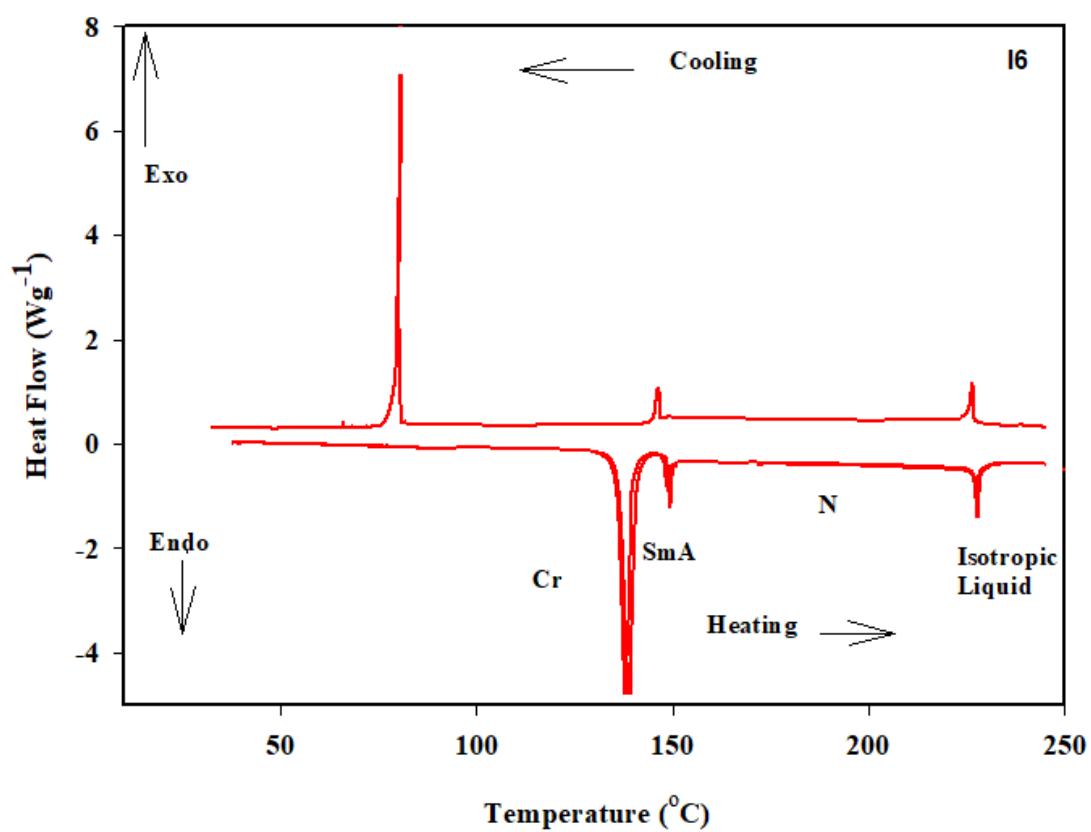

**Figure S1.** DSC thermograms of I6: were recorded from the second heating scan and (b) from the second cooling scan with a rate of 10 °C/min.

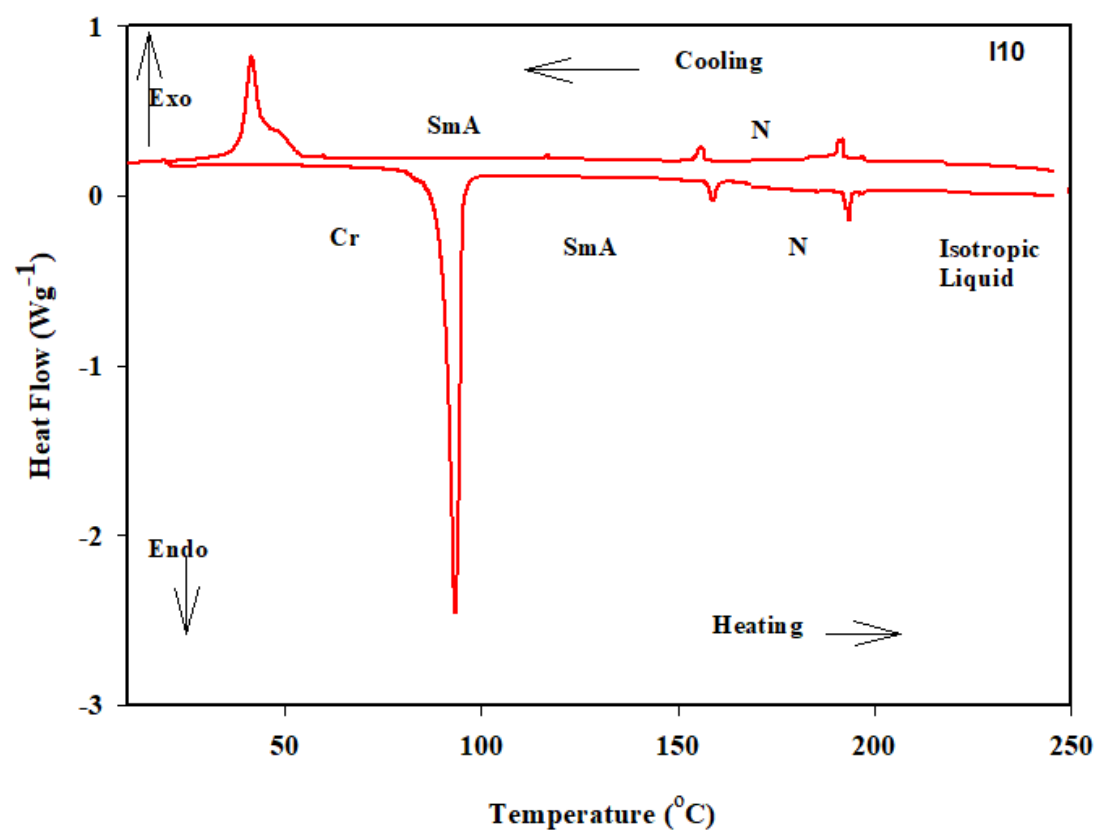

**Figure S2.** DSC thermograms of **110**: were recorded from the second heating scan and (b) from the second cooling scan with a rate of 10  $^{\circ}\text{C}/\text{min}$ .

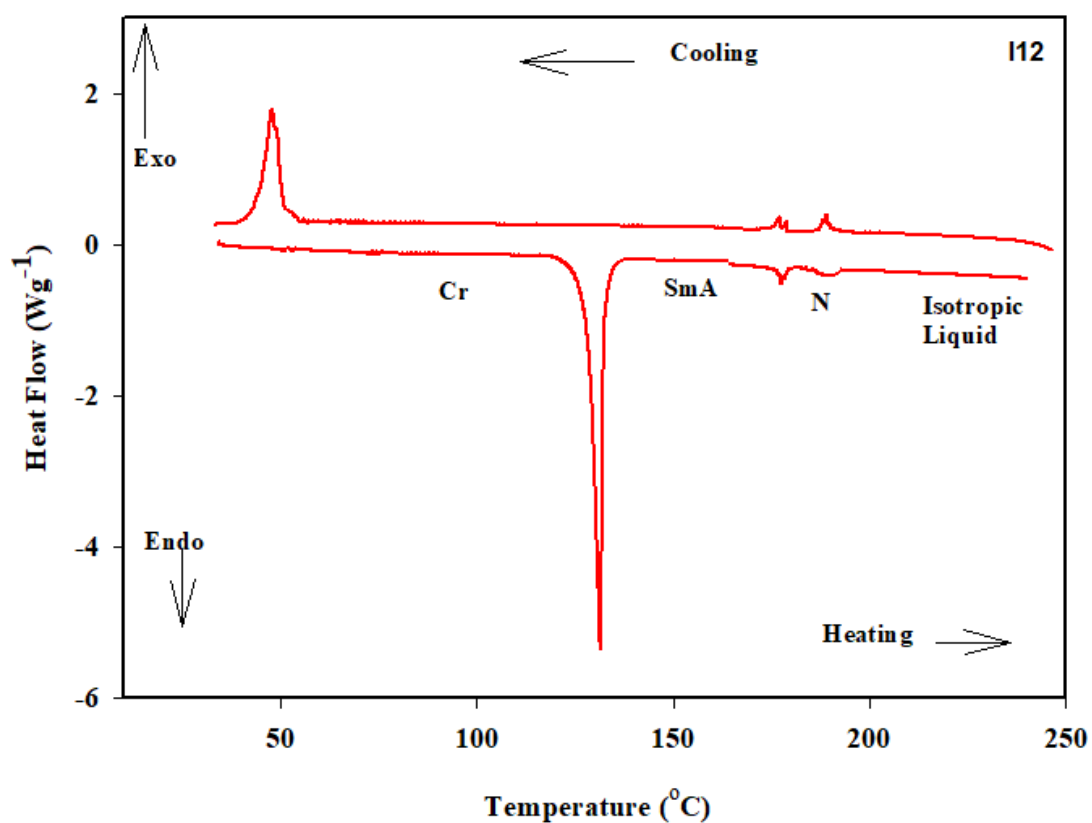

**Figure S3.** DSC thermograms of **I12**: were recorded from the second heating scan and (b) from the second cooling scan with a rate of 10 °C/min.

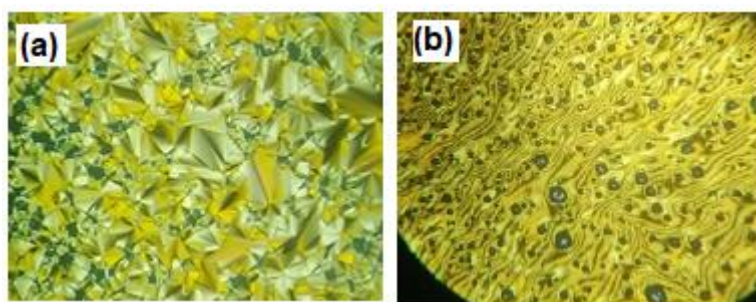

**Figure S4.** POM textures of **I10** compound during heating ;(a) SmA phase at 120 °C and (b) N phase at 190 ° C.

**Optimized geometries (bond length, bend angle and dihedral angle) of the homologous series In at the B3LYP/6-31+G(d,p) level of theory**

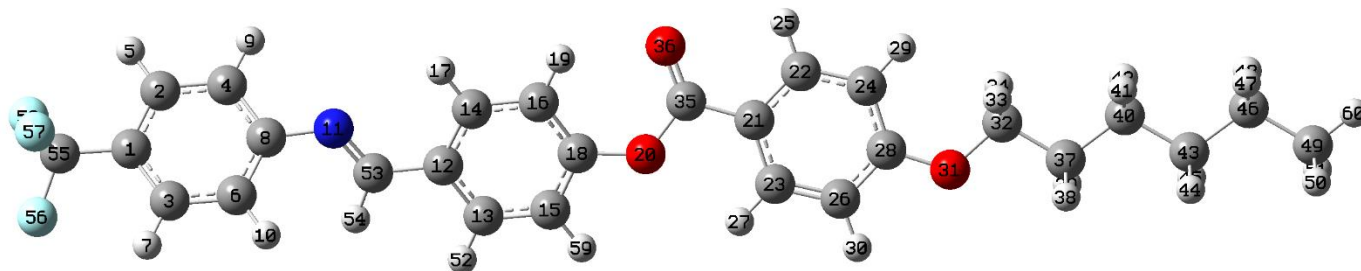

| Symbol | NA | NB | NC | Bond     | Angle    | Dihedral |
|--------|----|----|----|----------|----------|----------|
| C      |    |    |    |          |          |          |
| C      | 1  |    |    | 1.402193 |          |          |
| C      | 1  | 2  |    | 1.399189 | 120.0067 |          |
| C      | 2  | 1  | 3  | 1.388946 | 119.9596 | 0.82548  |
| H      | 2  | 1  | 3  | 1.080183 | 119.8474 | -179.495 |
| C      | 3  | 1  | 2  | 1.391898 | 120.0147 | -1.46865 |
| H      | 3  | 1  | 2  | 1.080206 | 119.8529 | 179.0295 |
| C      | 4  | 2  | 1  | 1.406029 | 120.5038 | 0.759295 |
| H      | 4  | 2  | 1  | 1.079901 | 121.0728 | -179.356 |
| H      | 6  | 3  | 1  | 1.081019 | 119.8101 | 178.4824 |
| N      | 8  | 4  | 2  | 1.409952 | 117.8693 | -179.127 |
| C      | 11 | 8  | 4  | 2.416778 | 152.8249 | -145.667 |
| C      | 12 | 11 | 8  | 1.407256 | 146.3364 | 8.125332 |
| C      | 12 | 11 | 8  | 1.406169 | 94.95044 | -172.339 |
| C      | 13 | 12 | 11 | 1.38979  | 120.6436 | 179.5603 |
| C      | 14 | 12 | 11 | 1.392063 | 121.3496 | -179.74  |
| H      | 14 | 12 | 11 | 1.080289 | 118.4762 | 0.172637 |
| C      | 15 | 13 | 12 | 1.397706 | 119.5339 | -0.13079 |
| H      | 16 | 14 | 12 | 1.074857 | 120.967  | 179.0934 |
| O      | 18 | 15 | 13 | 1.410427 | 113.5541 | 178.47   |
| C      | 20 | 18 | 15 | 2.370593 | 161.3051 | 168.1023 |
| C      | 21 | 20 | 18 | 1.403416 | 151.2684 | -2.28349 |
| C      | 21 | 20 | 18 | 1.409149 | 89.6357  | 178.5293 |
| C      | 22 | 21 | 20 | 1.392131 | 120.9344 | -179.002 |
| H      | 22 | 21 | 20 | 1.080629 | 118.7016 | 0.994744 |
| C      | 23 | 21 | 20 | 1.385845 | 120.3257 | 179.5439 |
| H      | 23 | 21 | 20 | 1.078613 | 119.4429 | -0.53242 |
| C      | 24 | 22 | 21 | 1.402611 | 119.3685 | -0.0502  |

|   |    |    |    |          |          |          |
|---|----|----|----|----------|----------|----------|
| H | 24 | 22 | 21 | 1.078987 | 119.5516 | 179.9881 |
| H | 26 | 23 | 21 | 1.079866 | 121.6104 | 179.9604 |
| O | 28 | 24 | 22 | 1.382619 | 124.3193 | 179.9881 |
| C | 31 | 28 | 24 | 1.466321 | 120.1599 | -0.47446 |
| H | 32 | 31 | 28 | 1.093863 | 109.2784 | 59.80774 |
| H | 32 | 31 | 28 | 1.093883 | 109.2544 | -59.2075 |
| C | 20 | 18 | 15 | 1.399026 | 126.1157 | 167.5931 |
| O | 35 | 20 | 18 | 1.234477 | 123.0582 | -0.29572 |
| C | 32 | 31 | 28 | 1.520946 | 107.0093 | -179.675 |
| H | 37 | 32 | 31 | 1.092775 | 108.6542 | -58.469  |
| H | 37 | 32 | 31 | 1.092813 | 108.5836 | 57.40705 |
| C | 37 | 32 | 31 | 1.53876  | 112.455  | 179.4225 |
| H | 40 | 37 | 32 | 1.096245 | 109.5983 | 58.06716 |
| H | 40 | 37 | 32 | 1.096211 | 109.5484 | -58.2233 |
| C | 40 | 37 | 32 | 1.538243 | 112.989  | 179.9423 |
| H | 43 | 40 | 37 | 1.096061 | 109.2447 | -58.141  |
| H | 43 | 40 | 37 | 1.096099 | 109.2343 | 57.6716  |
| C | 43 | 40 | 37 | 1.538221 | 113.413  | 179.7573 |
| H | 46 | 43 | 40 | 1.095507 | 109.1645 | 57.81825 |
| H | 46 | 43 | 40 | 1.095474 | 109.1548 | -57.8629 |
| C | 46 | 43 | 40 | 1.535857 | 113.1485 | 179.9799 |
| H | 49 | 46 | 43 | 1.092904 | 111.1172 | -59.8503 |
| H | 49 | 46 | 43 | 1.092907 | 111.1228 | 59.98573 |
| H | 13 | 12 | 11 | 1.082881 | 119.7795 | -0.45005 |
| C | 11 | 8  | 4  | 1.289998 | 122.3997 | -141.493 |
| H | 53 | 11 | 8  | 1.095895 | 121.2497 | 4.610114 |
| C | 1  | 3  | 6  | 1.485204 | 120.0233 | -177.077 |
| F | 55 | 1  | 3  | 1.401464 | 112.8153 | -29.4458 |
| F | 55 | 1  | 3  | 1.40848  | 112.8808 | 90.137   |
| F | 55 | 1  | 3  | 1.401652 | 112.7758 | -150.431 |
| H | 15 | 13 | 12 | 1.079738 | 121.5278 | 179.9081 |
| H | 49 | 46 | 43 | 1.091793 | 111.3416 | -179.932 |

---

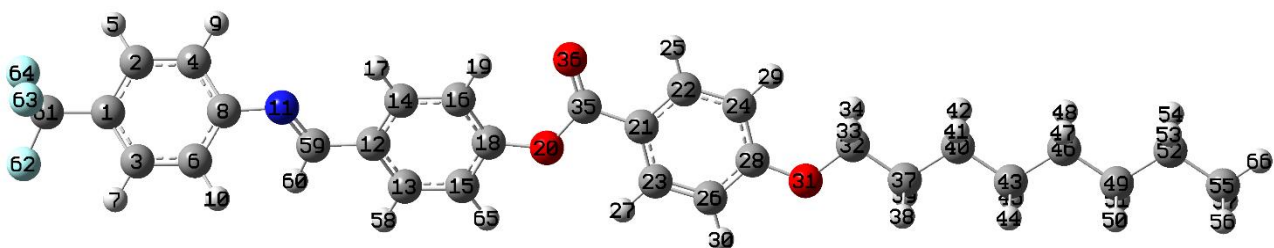

| Symbol | NA | NB | NC | Bond     | Angle    | Dihedral |
|--------|----|----|----|----------|----------|----------|
| C      |    |    |    |          |          |          |
| C      | 1  |    |    | 1.402197 |          |          |
| C      | 1  | 2  |    | 1.39919  | 120.0068 |          |
| C      | 2  | 1  | 3  | 1.38894  | 119.9597 | 0.82341  |
| H      | 2  | 1  | 3  | 1.080184 | 119.8468 | -179.496 |
| C      | 3  | 1  | 2  | 1.391899 | 120.0145 | -1.46693 |
| H      | 3  | 1  | 2  | 1.080206 | 119.8525 | 179.0308 |
| C      | 4  | 2  | 1  | 1.406033 | 120.5037 | 0.75878  |
| H      | 4  | 2  | 1  | 1.0799   | 121.073  | -179.354 |
| H      | 6  | 3  | 1  | 1.08102  | 119.8104 | 178.4821 |
| N      | 8  | 4  | 2  | 1.409939 | 117.8689 | -179.12  |
| C      | 11 | 8  | 4  | 2.416751 | 152.8297 | -145.679 |
| C      | 12 | 11 | 8  | 1.407252 | 146.3399 | 8.139682 |
| C      | 12 | 11 | 8  | 1.406177 | 94.94652 | -172.324 |
| C      | 13 | 12 | 11 | 1.389804 | 120.6433 | 179.5601 |
| C      | 14 | 12 | 11 | 1.392046 | 121.3487 | -179.74  |
| H      | 14 | 12 | 11 | 1.08029  | 118.4758 | 0.172229 |
| C      | 15 | 13 | 12 | 1.397693 | 119.5333 | -0.13074 |
| H      | 16 | 14 | 12 | 1.074861 | 120.9658 | 179.0823 |
| O      | 18 | 15 | 13 | 1.410427 | 113.5613 | 178.4479 |
| C      | 20 | 18 | 15 | 2.370645 | 161.2885 | 167.9675 |
| C      | 21 | 20 | 18 | 1.403422 | 151.2665 | -2.34099 |
| C      | 21 | 20 | 18 | 1.409155 | 89.63746 | 178.4797 |
| C      | 22 | 21 | 20 | 1.392121 | 120.9351 | -178.993 |
| H      | 22 | 21 | 20 | 1.08063  | 118.7014 | 1.002368 |
| C      | 23 | 21 | 20 | 1.385845 | 120.3251 | 179.5408 |
| H      | 23 | 21 | 20 | 1.078614 | 119.4436 | -0.53624 |
| C      | 24 | 22 | 21 | 1.402625 | 119.3681 | -0.05236 |
| H      | 24 | 22 | 21 | 1.078989 | 119.5538 | 179.985  |
| H      | 26 | 23 | 21 | 1.079867 | 121.6105 | 179.9596 |
| O      | 28 | 24 | 22 | 1.382596 | 124.3178 | 179.9901 |
| C      | 31 | 28 | 24 | 1.466353 | 120.1555 | -0.4879  |
| H      | 32 | 31 | 28 | 1.09386  | 109.2767 | 59.8134  |
| H      | 32 | 31 | 28 | 1.093883 | 109.2496 | -59.1977 |

|   |    |    |    |          |          |          |
|---|----|----|----|----------|----------|----------|
| C | 20 | 18 | 15 | 1.399071 | 126.1014 | 167.4285 |
| O | 35 | 20 | 18 | 1.234473 | 123.0537 | -0.31295 |
| C | 32 | 31 | 28 | 1.520922 | 107.018  | -179.666 |
| H | 37 | 32 | 31 | 1.092789 | 108.6583 | -58.4878 |
| H | 37 | 32 | 31 | 1.092822 | 108.5846 | 57.39112 |
| C | 37 | 32 | 31 | 1.538739 | 112.4469 | 179.4001 |
| H | 40 | 37 | 32 | 1.096225 | 109.6037 | 58.06189 |
| H | 40 | 37 | 32 | 1.096199 | 109.5469 | -58.2285 |
| C | 40 | 37 | 32 | 1.538464 | 112.9845 | 179.9428 |
| H | 43 | 40 | 37 | 1.095939 | 109.1992 | -58.2099 |
| H | 43 | 40 | 37 | 1.095975 | 109.1834 | 57.56537 |
| C | 43 | 40 | 37 | 1.537975 | 113.3719 | 179.6588 |
| H | 46 | 43 | 40 | 1.096406 | 109.2551 | 57.86637 |
| H | 46 | 43 | 40 | 1.096389 | 109.232  | -57.9257 |
| C | 46 | 43 | 40 | 1.538037 | 113.4858 | 179.9825 |
| H | 49 | 46 | 43 | 1.096456 | 109.2722 | -58.0052 |
| H | 49 | 46 | 43 | 1.096481 | 109.2655 | 57.77668 |
| C | 49 | 46 | 43 | 1.538448 | 113.5383 | 179.8814 |
| H | 52 | 49 | 46 | 1.095546 | 109.1386 | 57.81585 |
| H | 52 | 49 | 46 | 1.095523 | 109.1346 | -57.8104 |
| C | 52 | 49 | 46 | 1.535922 | 113.2141 | -179.997 |
| H | 55 | 52 | 49 | 1.092993 | 111.1066 | -59.8429 |
| H | 55 | 52 | 49 | 1.092993 | 111.1105 | 59.95641 |
| H | 13 | 12 | 11 | 1.082881 | 119.78   | -0.45069 |
| C | 11 | 8  | 4  | 1.289998 | 122.4036 | -141.499 |
| H | 59 | 11 | 8  | 1.095895 | 121.2498 | 4.612358 |
| C | 1  | 3  | 6  | 1.485202 | 120.0241 | -177.074 |
| F | 61 | 1  | 3  | 1.401463 | 112.8155 | -29.4324 |
| F | 61 | 1  | 3  | 1.408476 | 112.8809 | 90.15067 |
| F | 61 | 1  | 3  | 1.401653 | 112.7761 | -150.418 |
| H | 15 | 13 | 12 | 1.07974  | 121.5278 | 179.9066 |
| H | 55 | 52 | 49 | 1.091934 | 111.3828 | -179.943 |

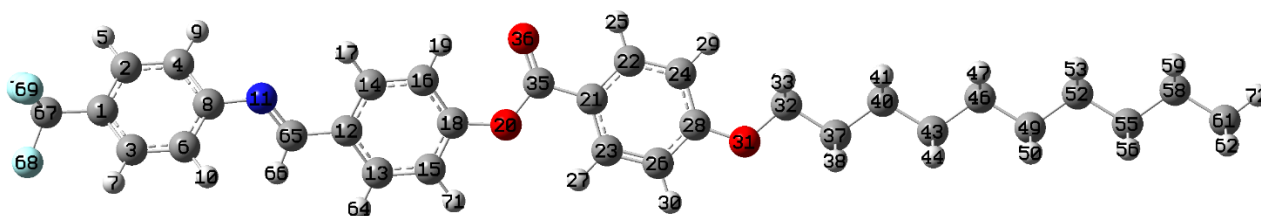

| Symbol | NA | NB | NC | Bond     | Angle | Dihedral |
|--------|----|----|----|----------|-------|----------|
| C      |    |    |    |          |       |          |
| C      | 1  |    |    | 1.402199 |       |          |



|   |    |    |    |          |          |          |
|---|----|----|----|----------|----------|----------|
| C | 1  | 2  |    | 1.399193 | 120.007  |          |
| C | 2  | 1  | 3  | 1.388935 | 119.9597 | 0.820834 |
| H | 2  | 1  | 3  | 1.080183 | 119.8461 | -179.498 |
| C | 3  | 1  | 2  | 1.391897 | 120.0143 | -1.46468 |
| H | 3  | 1  | 2  | 1.080208 | 119.852  | 179.033  |
| C | 4  | 2  | 1  | 1.406036 | 120.5039 | 0.758222 |
| H | 4  | 2  | 1  | 1.079901 | 121.0731 | -179.351 |
| H | 6  | 3  | 1  | 1.081023 | 119.8108 | 178.4817 |
| N | 8  | 4  | 2  | 1.409926 | 117.869  | -179.112 |
| C | 11 | 8  | 4  | 2.416726 | 152.8332 | -145.697 |
| C | 12 | 11 | 8  | 1.40725  | 146.3432 | 8.16133  |
| C | 12 | 11 | 8  | 1.406183 | 94.94318 | -172.3   |
| C | 13 | 12 | 11 | 1.389813 | 120.6431 | 179.5653 |
| C | 14 | 12 | 11 | 1.392034 | 121.3485 | -179.744 |
| H | 14 | 12 | 11 | 1.080289 | 118.4753 | 0.169172 |
| C | 15 | 13 | 12 | 1.397683 | 119.533  | -0.12989 |
| H | 16 | 14 | 12 | 1.074863 | 120.9658 | 179.0778 |
| O | 18 | 15 | 13 | 1.410434 | 113.5645 | 178.4325 |
| C | 20 | 18 | 15 | 2.370683 | 161.2804 | 167.9888 |
| C | 21 | 20 | 18 | 1.403427 | 151.2641 | -2.40679 |
| C | 21 | 20 | 18 | 1.409162 | 89.63985 | 178.3954 |
| C | 22 | 21 | 20 | 1.392113 | 120.9357 | -179.019 |
| H | 22 | 21 | 20 | 1.080631 | 118.7008 | 0.978342 |
| C | 23 | 21 | 20 | 1.385843 | 120.3244 | 179.5539 |
| H | 23 | 21 | 20 | 1.078613 | 119.4446 | -0.52498 |
| C | 24 | 22 | 21 | 1.402635 | 119.3673 | -0.05223 |
| H | 24 | 22 | 21 | 1.078992 | 119.5561 | 179.984  |
| H | 26 | 23 | 21 | 1.079868 | 121.6107 | 179.9575 |
| O | 28 | 24 | 22 | 1.382586 | 124.3166 | 179.9975 |
| C | 31 | 28 | 24 | 1.466364 | 120.1528 | -0.45936 |
| H | 32 | 31 | 28 | 1.09386  | 109.2751 | 59.7881  |
| H | 32 | 31 | 28 | 1.093882 | 109.2483 | -59.2211 |
| C | 20 | 18 | 15 | 1.399088 | 126.095  | 167.385  |
| O | 35 | 20 | 18 | 1.234471 | 123.0516 | -0.34601 |
| C | 32 | 31 | 28 | 1.520917 | 107.0211 | -179.692 |
| H | 37 | 32 | 31 | 1.092791 | 108.6583 | -58.4683 |
| H | 37 | 32 | 31 | 1.092821 | 108.5875 | 57.41245 |
| C | 37 | 32 | 31 | 1.53874  | 112.4437 | 179.4219 |
| H | 40 | 37 | 32 | 1.096225 | 109.6028 | 58.05924 |
| H | 40 | 37 | 32 | 1.096203 | 109.5462 | -58.2291 |
| C | 40 | 37 | 32 | 1.538455 | 112.989  | 179.9414 |
| H | 43 | 40 | 37 | 1.095952 | 109.2004 | -58.2211 |
| H | 43 | 40 | 37 | 1.095988 | 109.1833 | 57.55436 |
| C | 43 | 40 | 37 | 1.537945 | 113.3673 | 179.6451 |
| H | 46 | 43 | 40 | 1.096387 | 109.2597 | 57.86291 |
| H | 46 | 43 | 40 | 1.096376 | 109.2325 | -57.9303 |

|   |    |    |    |          |          |          |
|---|----|----|----|----------|----------|----------|
| C | 46 | 43 | 40 | 1.538263 | 113.4782 | 179.9819 |
| H | 49 | 46 | 43 | 1.096325 | 109.2254 | -58.0408 |
| H | 49 | 46 | 43 | 1.09635  | 109.2149 | 57.70486 |
| C | 49 | 46 | 43 | 1.538228 | 113.4981 | 179.821  |
| H | 52 | 49 | 46 | 1.096451 | 109.2257 | 57.87088 |
| H | 52 | 49 | 46 | 1.096439 | 109.2129 | -57.865  |
| C | 52 | 49 | 46 | 1.538031 | 113.551  | -179.99  |
| H | 55 | 52 | 49 | 1.096534 | 109.2656 | -57.9323 |
| H | 55 | 52 | 49 | 1.096551 | 109.2604 | 57.82922 |
| C | 55 | 52 | 49 | 1.538454 | 113.5724 | 179.9463 |
| H | 58 | 55 | 52 | 1.095564 | 109.1323 | 57.81999 |
| H | 58 | 55 | 52 | 1.095548 | 109.1309 | -57.7911 |
| C | 58 | 55 | 52 | 1.535962 | 113.2318 | -179.986 |
| H | 61 | 58 | 55 | 1.093028 | 111.1006 | -59.84   |
| H | 61 | 58 | 55 | 1.093029 | 111.1035 | 59.94092 |
| H | 13 | 12 | 11 | 1.082883 | 119.7804 | -0.44737 |
| C | 11 | 8  | 4  | 1.29     | 122.4066 | -141.505 |
| H | 65 | 11 | 8  | 1.095893 | 121.2499 | 4.616855 |
| C | 1  | 3  | 6  | 1.485199 | 120.0231 | -177.07  |
| F | 67 | 1  | 3  | 1.40147  | 112.815  | -29.4503 |
| F | 67 | 1  | 3  | 1.408471 | 112.8813 | 90.13184 |
| F | 67 | 1  | 3  | 1.40165  | 112.7768 | -150.436 |
| H | 15 | 13 | 12 | 1.07974  | 121.5276 | 179.9033 |
| H | 61 | 58 | 55 | 1.091996 | 111.4    | -179.949 |

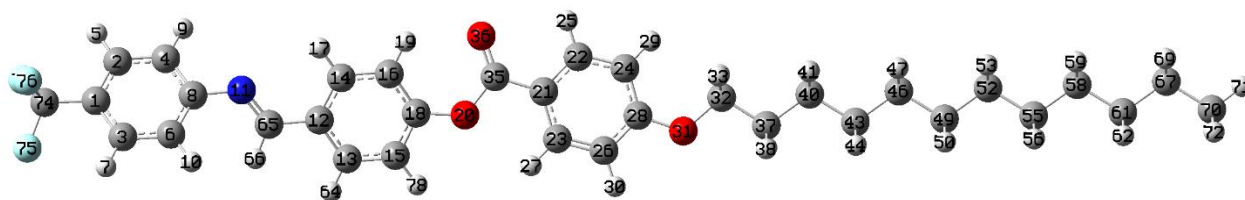

| Symbol | NA | NB | NC | Bond     | Angle    | Dihedral |
|--------|----|----|----|----------|----------|----------|
| C      |    |    |    |          |          |          |
| C      | 1  |    |    | 1.402195 |          |          |
| C      | 1  | 2  |    | 1.399193 | 120.0075 |          |
| C      | 2  | 1  | 3  | 1.388941 | 119.9598 | 0.818629 |
| H      | 2  | 1  | 3  | 1.080181 | 119.8467 | -179.499 |
| C      | 3  | 1  | 2  | 1.391899 | 120.0139 | -1.46274 |
| H      | 3  | 1  | 2  | 1.080207 | 119.8526 | 179.0344 |
| C      | 4  | 2  | 1  | 1.406029 | 120.5033 | 0.757845 |
| H      | 4  | 2  | 1  | 1.0799   | 121.0728 | -179.349 |
| H      | 6  | 3  | 1  | 1.081023 | 119.8115 | 178.4817 |

|   |    |    |    |          |          |          |
|---|----|----|----|----------|----------|----------|
| N | 8  | 4  | 2  | 1.409932 | 117.8693 | -179.105 |
| C | 11 | 8  | 4  | 2.416709 | 152.836  | -145.707 |
| C | 12 | 11 | 8  | 1.407257 | 146.3451 | 8.175825 |
| C | 12 | 11 | 8  | 1.406176 | 94.94128 | -172.28  |
| C | 13 | 12 | 11 | 1.38981  | 120.6428 | 179.5736 |
| C | 14 | 12 | 11 | 1.392035 | 121.3487 | -179.75  |
| H | 14 | 12 | 11 | 1.08029  | 118.4755 | 0.165057 |
| C | 15 | 13 | 12 | 1.397685 | 119.5332 | -0.12936 |
| H | 16 | 14 | 12 | 1.074863 | 120.966  | 179.0765 |
| O | 18 | 15 | 13 | 1.410428 | 113.5667 | 178.4214 |
| C | 20 | 18 | 15 | 2.370697 | 161.2752 | 168.0526 |
| C | 21 | 20 | 18 | 1.403431 | 151.2621 | -2.4713  |
| C | 21 | 20 | 18 | 1.409166 | 89.64158 | 178.3089 |
| C | 22 | 21 | 20 | 1.39211  | 120.9361 | -179.049 |
| H | 22 | 21 | 20 | 1.080631 | 118.7005 | 0.949384 |
| C | 23 | 21 | 20 | 1.385841 | 120.3237 | 179.5704 |
| H | 23 | 21 | 20 | 1.078613 | 119.4455 | -0.5113  |
| C | 24 | 22 | 21 | 1.402641 | 119.3663 | -0.05204 |
| H | 24 | 22 | 21 | 1.078995 | 119.5584 | 179.9831 |
| H | 26 | 23 | 21 | 1.079867 | 121.6109 | 179.9543 |
| O | 28 | 24 | 22 | 1.382585 | 124.3161 | -179.995 |
| C | 31 | 28 | 24 | 1.466367 | 120.1511 | -0.41423 |
| H | 32 | 31 | 28 | 1.093861 | 109.2737 | 59.74615 |
| H | 32 | 31 | 28 | 1.093882 | 109.2481 | -59.2619 |
| C | 20 | 18 | 15 | 1.399089 | 126.0911 | 167.3807 |
| O | 35 | 20 | 18 | 1.234474 | 123.0502 | -0.37977 |
| C | 32 | 31 | 28 | 1.520915 | 107.0222 | -179.736 |
| H | 37 | 32 | 31 | 1.092792 | 108.6561 | -58.4319 |
| H | 37 | 32 | 31 | 1.09282  | 108.5913 | 57.4497  |
| C | 37 | 32 | 31 | 1.538741 | 112.4423 | 179.4624 |
| H | 40 | 37 | 32 | 1.096224 | 109.601  | 58.05828 |
| H | 40 | 37 | 32 | 1.096204 | 109.5474 | -58.2295 |
| C | 40 | 37 | 32 | 1.538455 | 112.9906 | 179.939  |
| H | 43 | 40 | 37 | 1.095953 | 109.2008 | -58.2077 |
| H | 43 | 40 | 37 | 1.095986 | 109.1844 | 57.5687  |
| C | 43 | 40 | 37 | 1.537943 | 113.3653 | 179.6597 |
| H | 46 | 43 | 40 | 1.096388 | 109.259  | 57.85894 |
| H | 46 | 43 | 40 | 1.096379 | 109.2316 | -57.9326 |
| C | 46 | 43 | 40 | 1.538256 | 113.4819 | 179.9787 |
| H | 49 | 46 | 43 | 1.096337 | 109.2263 | -58.0498 |
| H | 49 | 46 | 43 | 1.096362 | 109.2148 | 57.69588 |
| C | 49 | 46 | 43 | 1.538198 | 113.494  | 179.8102 |
| H | 52 | 49 | 46 | 1.096431 | 109.23   | 57.86806 |
| H | 52 | 49 | 46 | 1.096423 | 109.2139 | -57.8697 |
| C | 52 | 49 | 46 | 1.53826  | 113.5422 | -179.991 |
| H | 55 | 52 | 49 | 1.096401 | 109.2181 | -57.9512 |

|   |    |    |    |          |          |          |
|---|----|----|----|----------|----------|----------|
| H | 55 | 52 | 49 | 1.096418 | 109.2101 | 57.77443 |
| C | 55 | 52 | 49 | 1.538245 | 113.5325 | 179.9048 |
| H | 58 | 55 | 52 | 1.096472 | 109.2177 | 57.87829 |
| H | 58 | 55 | 52 | 1.096462 | 109.2098 | -57.8423 |
| C | 58 | 55 | 52 | 1.53804  | 113.5685 | -179.978 |
| H | 61 | 58 | 55 | 1.096562 | 109.2618 | -57.8975 |
| H | 61 | 58 | 55 | 1.096575 | 109.2575 | 57.85474 |
| H | 13 | 12 | 11 | 1.082884 | 119.7802 | -0.44167 |
| C | 11 | 8  | 4  | 1.289994 | 122.409  | -141.506 |
| H | 65 | 11 | 8  | 1.095892 | 121.2507 | 4.623593 |
| C | 61 | 58 | 55 | 1.538457 | 113.5867 | 179.9776 |
| H | 67 | 61 | 58 | 1.095558 | 109.1296 | -57.7836 |
| H | 67 | 61 | 58 | 1.095571 | 109.1299 | 57.82177 |
| C | 67 | 61 | 58 | 1.535984 | 113.2386 | -179.981 |
| H | 70 | 67 | 61 | 1.092031 | 111.4086 | -179.954 |
| H | 70 | 67 | 61 | 1.093043 | 111.0968 | -59.8399 |
| H | 70 | 67 | 61 | 1.093042 | 111.0993 | 59.93214 |
| C | 1  | 3  | 6  | 1.485199 | 120.0229 | -177.067 |
| F | 74 | 1  | 3  | 1.401467 | 112.8155 | -29.4585 |
| F | 74 | 1  | 3  | 1.408483 | 112.8812 | 90.12306 |
| F | 74 | 1  | 3  | 1.401653 | 112.7775 | -150.445 |
| H | 15 | 13 | 12 | 1.079743 | 121.5279 | 179.899  |

---
